# Supplementary material for: Formic acid oxidation on platinum: a simple mechanistic study
Source: Royal Society of Chemistry journal article supplement (doi:10.1039/c5cp03045e), 2015-01-01
Supplement: c5cp03045e1.pdf [file c5cp03045e1.pdf]

## Supplementary Information: Formic Acid oxidation on platinum- a simple mechanistic study

Kathleen A. Schwarz<sup>1</sup>

*Material Measurement Laboratory, National Institute of Standards and  
Technology, 100 Bureau Drive, Gaithersburg, Maryland, 20899 USA*

Ravishankar Sundararaman

*The Joint Center for Artificial Photosynthesis, California, USA*

Thomas P. Moffat

Thomas C. Allison

*Material Measurement Laboratory, National Institute of Standards and  
Technology, 100 Bureau Drive, Gaithersburg, Maryland, 20899 USA*

### 1 Passivation of Pt(111) by H

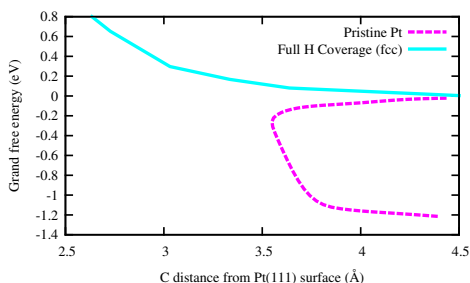

Figure 1: Formate approaching pristine Pt(111), and Pt(111) covered with H, both at 0 V

Figure 1 illustrates the repulsive interaction between formate and a Pt(111) surface fully covered with hydrogen at the fcc sites.

---

<sup>1</sup>kathleen.schwarz@nist.gov

## 2 Rate Dependence

We will evaluate the rate dependence on pH, where the rate equations are written as:

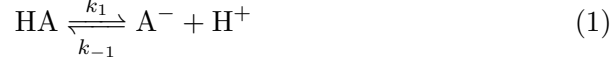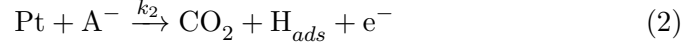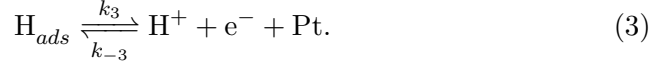

We will first evaluate the pH dependence of these reactions in the regime where equation 2 is the limiting step, when Equations 1 and 3 are at equilibrium.

The equilibrium constant of the formic acid is written as:

$$K_1 = K_a = \frac{[\text{A}^-][\text{H}^+]}{[\text{HA}]}. \quad (4)$$

Given an initial formic acid concentration of  $\text{HA}_{tot}$ , we must separate out the  $\text{H}^+$  dependence in this equation, so

$$[\text{HA}] = [\text{HA}_{tot}] - [\text{A}^-]. \quad (5)$$

Solving for  $\text{A}^-$ , this gives

$$[\text{A}^-] = \frac{K_a[\text{HA}_{tot}]}{[\text{H}^+] + K_a} \quad (6)$$

We assume that we are in a voltage and concentration regime where the adsorbates that block the platinum sites are only the adsorbed hydrogen atoms:

$$[\text{Pt}_{tot}] - [\text{H}_{ads}] = [\text{Pt}] \quad (7)$$

(Alternatively, if the adsorbates do not bind with a pH dependence,  $\text{Pt}_{tot}$  represents sum of available sites and sites with adsorbed hydrogen, at a given voltage.)

Using the steady-state assumption for Equation 3, we get:

$$K_3 = \frac{[\text{H}^+]f(E)([\text{Pt}_{tot}] - [\text{H}_{ads}])}{[\text{H}_{ads}]} \quad (8)$$

where  $f(E)$  is the standard exponential dependence on voltage assuming Butler-Volmer kinetics. Solving for  $[H_{ads}]$ :

$$[H_{ads}] = \frac{[H^+]f_3(E)[Pt_{tot}]}{K_3 + [H^+]f_{-3}(E)} \quad (9)$$

Now, the rate-limiting step is the middle reaction, which can be written as:

$$\text{rate} = k_2([Pt_{tot}] - [H_{ads}])[A^-]f_2(E) \quad (10)$$

and now using the expression for  $H_{ads}$  above, we can write this as:

$$\text{rate} = k_2([Pt_{tot}] - \frac{[H^+]f_3(E)[Pt_{tot}]}{K_3 + [H^+]f_{-3}(E)})[A^-]f_2(E) \quad (11)$$

When  $K_3$  is relatively very large (i.e. not much  $H_{ads}$ ), the rate is just dependent on  $A^-$ . As the pH increases, we expect the current to follow the concentration of  $A^-$ , which increases sharply at the  $pK_a$ , and then plateaus.

On the other hand, if  $K_3$  is smaller, than the hydrogen adsorption term can contribute to the rate dependence. However, this term will lead to increases in current with pH, so will not lead to a peak as seen by Joo et al. If, instead of the hydrogen of Equation 3 being the dominant poison species of the platinum sites, species that poison that require a proton to desorb are more important, then we have:

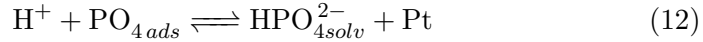

where we use adsorbed phosphate as an example of a possible poisoning species.

This leads to

$$K_{13} = \frac{[HPO_{4solv}^{2-}][Pt]}{[H^+][PO_{4ads}]} \quad (13)$$

Solving for  $PO_{4ads}$ , we have:

$$PO_{4ads} = \frac{[Pt_{tot}]}{1 + \frac{K_{13}[H^+]}{[HPO_{4solv}^{2-}]}} \quad (14)$$

The pH dependence of this term leads to the overall rate having a maximum near the  $pK_a$  of formic acid.
